# Supplementary material
Source: Springer Nature journal article supplement (https://www.springermedizin.de/resource/supplementary/12889_2013_7502_MOESM2_ESM.pdf/9497914)

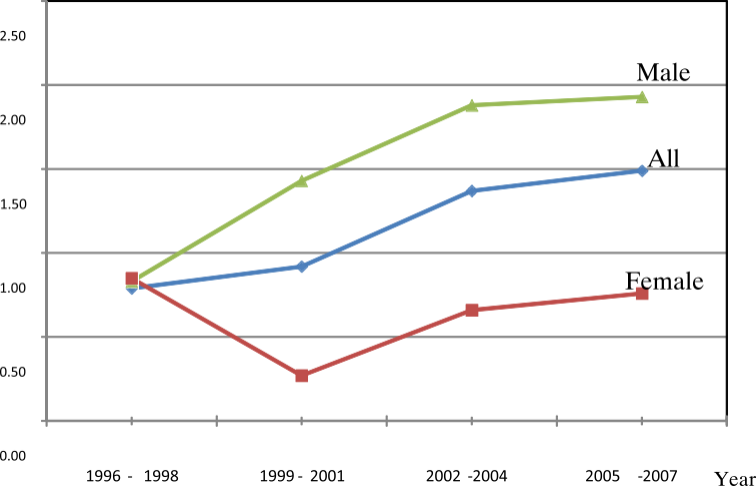

Supplement: MOESM2 [file 9497914]
